# Supplementary material for: A Novel Candidate Region for Genetic Adaptation to High Altitude in Andean Populations
Source: PLoS One. 2015 May 11;10(5):e0125444. doi: 10.1371/journal.pone.0125444 (PMC4427407; doi:10.1371/journal.pone.0125444)
Supplement: S1 Table — The ‘robust set’ enhancers and the ‘enhancer_tss_association’ were downloaded from the FANTOM5 project [56] (http://enhancer.binf.ku.dk/Pre-defined_tracks.html). (XLSX) [file pone.0125444.s008.xlsx]

## Sheet: Sheet1
Table S1. Enhancers and associated genes in the candidate region.
Starts	Ends	Enhancer_tss_associations	SNPs	DAF_HL	DAF_LL	Fst	Significant
81138677	81139093
81159335	81159579	ZCCHC24	rs1610176	0.118	0.125	0
81179342	81179695
81191596	81191949		rs13376836	0.961	0.65	0.305	**
81686994	81687205	ZCCHC24	rs12413678	0.118	0.725	0.565	***
81698656	81698964	ANXA11
81864199	81864479
81946319	81946704	ANXA11
81956011	81956585	ANXA11
81959510	81960003	ANXA11,TSPAN14,SH2D4B	rs2819942	0.803	0.15	0.583	***
81960969	81961796	ANXA11,SH2D4B	rs2819941	0.803	0.15	0.583	***
			rs57747679	0.039	0	0.012
			rs61860052	0.026	0.1	0.035
81962798	81963579	ANXA11,SH2D4B	rs2819939	0.803	0.15	0.583	***
82081125	82081270	TMEM254,MAT1A
82152153	82152272
82176099	82176325	FAM213A	rs77999529	0.026	0.05	0
			rs150230265	0.382	0.05	0.229	*
82209051	82209233	TSPAN14,SH2D4B	rs7095954	0.882	0.425	0.395	**
82211651	82212098	SH2D4B	rs117609486	0.026	0	0.001
			rs12245180	0.132	0.575	0.37	**
82214819	82214901	TSPAN14
82215085	82215437	TSPAN14,SH2D4B	rs10887914	0.132	0.575	0.37	**
			10:82215395	0	0.075	0.088
82237584	82237869	TSPAN14
82245417	82245911	TSPAN14	rs35998463	0.882	0.45	0.366	**
82246029	82246351	TSPAN14
82247433	82247863	TSPAN14
82251425	82251820	TSPAN14	rs17680741	0.092	0.55	0.417	***
			rs7922621	0.039	0.15	0.064
			rs7910643	0.961	0.85	0.064
82258642	82258780	TSPAN14
82260440	82261008	TSPAN14
82288045	82288198	TSPAN14,SH2D4B	rs6586051	0.816	0.425	0.281	**
82299421	82299771	SH2D4B	rs73307107	0.329	0.075	0.145	*
			rs72824338	0	0.05	0.053
82416293	82416679	MAT1A,SH2D4B
82420559	82420816	ANXA11,SH2D4B
82509932	82510235
